# Supplementary material for: Changes in the Sensitization Pattern to Alternaria alternata Allergens in Patients Treated with Alt a 1 Immunotherapy
Source: MDPI journal article supplement (doi:10.3390/jof7110974), 2021-11-16
Supplement: s1 [file s1]

**Table S1.** Summary of the demographic data of the population analysed in this study, already analysed in the previous clinical trial (J Allergy Clin Immunol 2019;144:216-23). P: Placebo; Ld: Low dose; Hd: High dose; MI: Mild Intermittent; SI: Severe Intermittent; MP: Mild Persistent; SP: Moderate/Severe Persistent; WA: Without asthma; I: Intermittent.

| Group        | Age<br>(Mean/Median) | <18<br>(%) | Males<br>(%) | Rhinitis (%) |      |      |      | Asthma (%) |      |      |      | Immunoglobulins |      | Wheal area          |         |
|--------------|----------------------|------------|--------------|--------------|------|------|------|------------|------|------|------|-----------------|------|---------------------|---------|
|              |                      |            |              | MI           | SI   | MP   | SP   | WA         | I    | MP   | SP   | IgE             | IgG4 | <i>A. alternata</i> | Alt a 1 |
| <b>P</b>     | 23.4/21              | 66.7       | 40           | 0            | 6.7  | 13.3 | 80   | 46.7       | 6.7  | 20   | 26.7 | 10.5            | 36.5 | 46.1                | 51.5    |
| <b>Ld</b>    | 22.7/22              | 45         | 40           | 0            | 5    | 20   | 75   | 30         | 35   | 20   | 15   | 14.2            | 30.5 | 43.5                | 50.1    |
| <b>Hd</b>    | 20.4/18              | 62.1       | 41.4         | 3.4          | 10.3 | 24.1 | 62.1 | 31         | 27.6 | 24.1 | 17.2 | 15.9            | 63.9 | 43.3                | 41.6    |
| <b>Total</b> | 21.7/19.5            | 57.8       | 40.6         | 1.6          | 7.8  | 20.3 | 57.8 | 34.4       | 25   | 21.9 | 18.8 | 15              | 50.5 | 43.8                | 46.4    |
