# Supplementary material for: Changes in the Sensitization Pattern to Alternaria alternata Allergens in Patients Treated with Alt a 1 Immunotherapy
Source: MDPI journal article supplement (doi:10.3390/jof7110974), 2021-11-16
Supplement: s1 [file s1]

Table S2. Description of allergens present in immunoblotting per patient. Mon: monosensitized; Poly: Polysensitized; P: Placebo; Ld: Low dose; Hd: High dose; :presence of allergen; :absence of allergen.

[illegible]
